# Supplementary material
Source: publisher site journal article supplement (https://kjim.org/upload/media/kjim-2023-476-Supplementary-Table-1.pdf)
Supplement: Supplementary file 1 [file kjim-2023-476-Supplementary-Table-1.pdf]

**Supplementary Table 1. Korean Gout Impact Scale Questionnaire**

| 통풍 삶의 영향 척도 질문지 (Korean Gout Impact Scale Questionnaire)                |                                                                                                                                                                |
|-------------------------------------------------------------------------|----------------------------------------------------------------------------------------------------------------------------------------------------------------|
| 1. 아래의 각 진술에 대해 얼마나 동의하거나 동의하지 않는지 표시해 주십시오. (각 문장에 대해 한개의 답에 표시해주십시오.) |                                                                                                                                                                |
| a. 내년 안에 통풍 발작이 생길까 봐 걱정이다.                                             | <input type="radio"/> 매우 동의함<br><input type="radio"/> 동의함<br><input type="radio"/> 잘 모르겠음<br><input type="radio"/> 동의하지 않음<br><input type="radio"/> 매우 동의하지 않음 |
| b. 시간이 지날수록 통풍이 더 악화될까 봐 두렵다.                                           | <input type="radio"/> 매우 동의함<br><input type="radio"/> 동의함<br><input type="radio"/> 잘 모르겠음<br><input type="radio"/> 동의하지 않음<br><input type="radio"/> 매우 동의하지 않음 |
| c. 통풍이 앞으로의 활동에 방해가 될까 봐 불안하다.                                          | <input type="radio"/> 매우 동의함<br><input type="radio"/> 동의함<br><input type="radio"/> 잘 모르겠음<br><input type="radio"/> 동의하지 않음<br><input type="radio"/> 매우 동의하지 않음 |
| d. 통풍으로 인해 여가 활동을 계속 즐기지 못할까 봐 걱정이다.                                    | <input type="radio"/> 매우 동의함<br><input type="radio"/> 동의함<br><input type="radio"/> 잘 모르겠음<br><input type="radio"/> 동의하지 않음<br><input type="radio"/> 매우 동의하지 않음 |
| e. 통풍 약물로 인한 부작용으로 힘들다.                                                 | <input type="radio"/> 매우 동의함<br><input type="radio"/> 동의함<br><input type="radio"/> 잘 모르겠음<br><input type="radio"/> 동의하지 않음<br><input type="radio"/> 매우 동의하지 않음 |
| f. 통풍 발작이 생기면 화가 난다.                                                    | <input type="radio"/> 매우 동의함<br><input type="radio"/> 동의함<br><input type="radio"/> 잘 모르겠음<br><input type="radio"/> 동의하지 않음<br><input type="radio"/> 매우 동의하지 않음 |
| g. 통풍 발작이 생길까 봐 미리 행사나 활동을 계획하기가 어렵다.                                   | <input type="radio"/> 매우 동의함<br><input type="radio"/> 동의함<br><input type="radio"/> 잘 모르겠음<br><input type="radio"/> 동의하지 않음<br><input type="radio"/> 매우 동의하지 않음 |
| h. 통풍 발작이 생기면 우울하다.                                                     | <input type="radio"/> 매우 동의함<br><input type="radio"/> 동의함<br><input type="radio"/> 잘 모르겠음<br><input type="radio"/> 동의하지 않음<br><input type="radio"/> 매우 동의하지 않음 |

Supplementary Table 1. Continued

| 통풍 삶의 영향 척도 질문지 (Korean Gout Impact Scale Questionnaire)      |                                                                                                                                                                |
|---------------------------------------------------------------|----------------------------------------------------------------------------------------------------------------------------------------------------------------|
| i. 현재 가지고 있는 약물은 통풍 발작을 치료하는 데 효과적이다.                         | <input type="radio"/> 매우 동의함<br><input type="radio"/> 동의함<br><input type="radio"/> 잘 모르겠음<br><input type="radio"/> 동의하지 않음<br><input type="radio"/> 매우 동의하지 않음 |
| j. 통풍 발작이 있을 때 사전에 계획했거나 중요한 활동을 하지 못한다.                      | <input type="radio"/> 매우 동의함<br><input type="radio"/> 동의함<br><input type="radio"/> 잘 모르겠음<br><input type="radio"/> 동의하지 않음<br><input type="radio"/> 매우 동의하지 않음 |
| k. 통풍 약물의 장기적인 영향에 대해 걱정한다.                                   | <input type="radio"/> 매우 동의함<br><input type="radio"/> 동의함<br><input type="radio"/> 잘 모르겠음<br><input type="radio"/> 동의하지 않음<br><input type="radio"/> 매우 동의하지 않음 |
| l. 현재 사용 중인 약물로는 통풍 발작을 잘 예방하지 못한다.                           | <input type="radio"/> 매우 동의함<br><input type="radio"/> 동의함<br><input type="radio"/> 잘 모르겠음<br><input type="radio"/> 동의하지 않음<br><input type="radio"/> 매우 동의하지 않음 |
| m. 나는 통풍을 스스로 잘 관리할 수 있다.                                     | <input type="radio"/> 매우 동의함<br><input type="radio"/> 동의함<br><input type="radio"/> 잘 모르겠음<br><input type="radio"/> 동의하지 않음<br><input type="radio"/> 매우 동의하지 않음 |
| 2. 마지막 통풍 발작 때 귀하는 다음을 얼마나 경험했습니까? (각 문장에 대해 한개의 답에 표시해주십시오.) |                                                                                                                                                                |
| a. 통풍 증상 때문에 결근하였나요?                                          | <input type="radio"/> 항상 (100%)<br><input type="radio"/> 대개<br><input type="radio"/> 일부 (50%)<br><input type="radio"/> 조금<br><input type="radio"/> 전혀 (0%)     |
| b. 통풍 증상으로 인해 일하기가 어렵습니까?                                     | <input type="radio"/> 항상 (100%)<br><input type="radio"/> 대개<br><input type="radio"/> 일부 (50%)<br><input type="radio"/> 조금<br><input type="radio"/> 전혀 (0%)     |
| c. 통풍 증상 때문에 여가 활동이나 사회 활동에 어려움이 있습니까?                        | <input type="radio"/> 항상 (100%)<br><input type="radio"/> 대개<br><input type="radio"/> 일부 (50%)<br><input type="radio"/> 조금<br><input type="radio"/> 전혀 (0%)     |

Supplementary Table 1. Continued

| 통풍 삶의 영향 척도 질문지 (Korean Gout Impact Scale Questionnaire)                  |                                                                                                                                                            |
|---------------------------------------------------------------------------|------------------------------------------------------------------------------------------------------------------------------------------------------------|
| d. 통풍 증상으로 인해 음식을 먹거나 목욕을 하거나 옷을 입는 것과 같은 자기 관리 활동에 어려움이 있습니까?            | <input type="radio"/> 항상 (100%)<br><input type="radio"/> 대개<br><input type="radio"/> 일부 (50%)<br><input type="radio"/> 조금<br><input type="radio"/> 전혀 (0%) |
| 3. 마지막 통풍 발작 때 귀하의 통풍 증상이 다음 사항에 얼마나 지장을 주었습니까? (각 문장에 대해 한개의 답을 표시해주세요.) |                                                                                                                                                            |
| a. 기분                                                                     | <input type="radio"/> 전혀<br><input type="radio"/> 조금<br><input type="radio"/> 보통<br><input type="radio"/> 상당히<br><input type="radio"/> 아주 많이               |
| b. 이동 능력                                                                  | <input type="radio"/> 전혀<br><input type="radio"/> 조금<br><input type="radio"/> 보통<br><input type="radio"/> 상당히<br><input type="radio"/> 아주 많이               |
| c. 수면                                                                     | <input type="radio"/> 전혀<br><input type="radio"/> 조금<br><input type="radio"/> 보통<br><input type="radio"/> 상당히<br><input type="radio"/> 아주 많이               |
| d. 일상적인 일 (집 밖의 업무와 집안일 포함)                                               | <input type="radio"/> 전혀<br><input type="radio"/> 조금<br><input type="radio"/> 보통<br><input type="radio"/> 상당히<br><input type="radio"/> 아주 많이               |
| e. 여가 활동                                                                  | <input type="radio"/> 전혀<br><input type="radio"/> 조금<br><input type="radio"/> 보통<br><input type="radio"/> 상당히<br><input type="radio"/> 아주 많이               |
| f. 삶의 즐거움                                                                 | <input type="radio"/> 전혀<br><input type="radio"/> 조금<br><input type="radio"/> 보통<br><input type="radio"/> 상당히<br><input type="radio"/> 아주 많이               |
| g. 하고 싶은 일을 할 수 있는 능력                                                     | <input type="radio"/> 전혀<br><input type="radio"/> 조금<br><input type="radio"/> 보통<br><input type="radio"/> 상당히<br><input type="radio"/> 아주 많이               |
